# Supplementary material for: Deformed wing virus prevalence in solitary bees put to the test: an experimental transmission study
Source: Frontiers journal article supplement (doi:10.3389/fevo.2023.1122304), 2023-06-30
Supplement: Table_1.DOCX [file Table_1.DOCX]

Supplementary Material

Deformed wing virus prevalence in solitary bees put to the test: an experimental transmission study

Alexandria Schauer*, Nadia Bianco, Orlando Yañez, Andrew Brown, Matthias Albrecht, Peter Neumann

*** Correspondence:** Corresponding Author: alexandria.schauer@unibe.ch

# Supplementary Figures and Tables

**Supplementary Table 1.** Experimental DWV-A viral titers for individual *Osmia bicornis* bees. Titers are expressed in log-transformed genome copies per microgram of RNA.

| Sample ID | Sex | Weight [g] | Treatment Group | DWV-A Titer  [log(DWV-A genome copies/µg RNA)] |
| --- | --- | --- | --- | --- |
| 84 | female | 0.150 | *O. bicornis* PBS Control | 3.60 |
| 86 | female | 0.081 | *O. bicornis* PBS Control | 3.91 |
| 88 | female | 0.121 | *O. bicornis* PBS Control | 3.68 |
| 90 | female | 0.107 | *O. bicornis* PBS Control | 3.32 |
| 92 | female | 0.100 | *O. bicornis* PBS Control | 4.32 |
| 94 | female | 0.067 | *O. bicornis* PBS Control | 4.18 |
| 96 | female | 0.080 | *O. bicornis* PBS Control | 2.93 |
| 98 | female | 0.080 | *O. bicornis* PBS Control | 3.95 |
| 100 | female | 0.137 | *O. bicornis* PBS Control | 3.34 |
| 102 | female | 0.106 | *O. bicornis* PBS Control | 3.94 |
| 104 | female | 0.133 | *O. bicornis* PBS Control | 3.69 |
| 106 | female | 0.145 | *O. bicornis* PBS Control | 3.08 |
| 108 | female | 0.095 | *O. bicornis* PBS Control | 2.74 |
| 110 | male | 0.053 | *O. bicornis* PBS Control | 4.06 |
| 112 | male | 0.085 | *O. bicornis* PBS Control | 4.17 |
| 114 | male | 0.055 | *O. bicornis* PBS Control | 4.24 |
| 116 | male | 0.053 | *O. bicornis* PBS Control | 3.35 |
| 119 | female | 0.099 | *O. bicornis* PBS Control | 3.77 |
| 120 | female | 0.120 | *O. bicornis* PBS Control | 3.65 |
| 121 | female | 0.094 | *O. bicornis* PBS Control | 3.37 |
| 122 | female | 0.094 | *O. bicornis* PBS Control | 3.86 |
| 123 | female | 0.105 | *O. bicornis* PBS Control | 3.48 |
| 124 | female | 0.074 | *O. bicornis* PBS Control | 3.66 |
| 125 | female | 0.083 | *O. bicornis* PBS Control | 3.51 |
| 126 | female | 0.108 | *O. bicornis* PBS Control | 3.46 |
| 127 | female | 0.080 | *O. bicornis* PBS Control | 3.59 |
| 128 | female | 0.110 | *O. bicornis* PBS Control | 3.66 |
| 129 | female | 0.116 | *O. bicornis* PBS Control | 3.51 |
| 130 | female | 0.104 | *O. bicornis* PBS Control | 3.57 |
| 131 | female | 0.100 | *O. bicornis* PBS Control | 3.77 |
| 132 | female | 0.109 | *O. bicornis* PBS Control | 3.59 |
| 149 | male | 0.051 | *O. bicornis* PBS Control | 4.47 |
| 150 | male | 0.049 | *O. bicornis* PBS Control | 3.73 |
| 151 | male | 0.048 | *O. bicornis* PBS Control | 3.39 |
| 152 | male | 0.066 | *O. bicornis* PBS Control | 3.62 |
| 153 | male | 0.093 | *O. bicornis* PBS Control | 3.48 |
| 154 | male | 0.072 | *O. bicornis* PBS Control | 3.75 |
| 155 | male | 0.043 | *O. bicornis* PBS Control | 4.49 |
| 156 | male | 0.057 | *O. bicornis* PBS Control | 3.11 |
| 157 | male | 0.059 | *O. bicornis* PBS Control | 4.35 |
| 158 | male | 0.055 | *O. bicornis* PBS Control | 4.69 |
| 159 | male | 0.045 | *O. bicornis* PBS Control | 3.75 |
| 160 | male | 0.065 | *O. bicornis* PBS Control | 3.30 |
| 161 | male | 0.069 | *O. bicornis* PBS Control | 3.03 |
| 85 | female | 0.144 | *O. bicornis* DWV | 5.86 |
| 87 | female | 0.085 | *O. bicornis* DWV | 6.99 |
| 89 | female | 0.086 | *O. bicornis* DWV | 6.45 |
| 91 | female | 0.102 | *O. bicornis* DWV | 5.46 |
| 93 | female | 0.078 | *O. bicornis* DWV | 6.42 |
| 95 | female | 0.132 | *O. bicornis* DWV | 6.45 |
| 97 | female | 0.093 | *O. bicornis* DWV | 6.17 |
| 99 | female | 0.112 | *O. bicornis* DWV | 6.03 |
| 101 | female | 0.113 | *O. bicornis* DWV | 5.20 |
| 103 | female | 0.139 | *O. bicornis* DWV | 5.61 |
| 105 | female | 0.131 | *O. bicornis* DWV | 6.21 |
| 107 | female | 0.112 | *O. bicornis* DWV | 6.70 |
| 109 | female | 0.136 | *O. bicornis* DWV | 6.55 |
| 111 | male | 0.093 | *O. bicornis* DWV | 5.87 |
| 113 | male | 0.089 | *O. bicornis* DWV | 6.46 |
| 115 | male | 0.049 | *O. bicornis* DWV | 6.83 |
| 117 | male | 0.042 | *O. bicornis* DWV | 5.25 |
| 118 | male | 0.033 | *O. bicornis* DWV | 5.91 |
| 133 | female | 0.105 | *O. bicornis* DWV | 5.39 |
| 134 | female | 0.100 | *O. bicornis* DWV | 6.02 |
| 135 | female | 0.156 | *O. bicornis* DWV | 5.38 |
| 136 | female | 0.097 | *O. bicornis* DWV | 5.69 |
| 137 | female | 0.105 | *O. bicornis* DWV | 5.02 |
| 138 | female | 0.065 | *O. bicornis* DWV | 4.19 |
| 139 | female | 0.079 | *O. bicornis* DWV | 5.02 |
| 140 | female | 0.103 | *O. bicornis* DWV | 5.93 |
| 141 | female | 0.094 | *O. bicornis* DWV | 5.64 |
| 142 | female | 0.105 | *O. bicornis* DWV | 4.46 |
| 143 | female | 0.091 | *O. bicornis* DWV | 4.04 |
| 144 | female | 0.098 | *O. bicornis* DWV | 5.24 |
| 145 | female | 0.088 | *O. bicornis* DWV | 5.23 |
| 146 | female | 0.123 | *O. bicornis* DWV | 4.82 |
| 147 | female | 0.099 | *O. bicornis* DWV | 5.32 |
| 148 | female | 0.151 | *O. bicornis* DWV | 4.67 |
| 162 | male | 0.052 | *O. bicornis* DWV | 6.27 |
| 163 | male | 0.053 | *O. bicornis* DWV | 5.10 |
| 164 | male | 0.042 | *O. bicornis* DWV | 5.66 |
| 165 | male | 0.052 | *O. bicornis* DWV | 5.07 |
| 166 | male | 0.062 | *O. bicornis* DWV | 5.19 |
| 167 | male | 0.048 | *O. bicornis* DWV | 5.54 |
| 168 | male | 0.047 | *O. bicornis* DWV | 5.01 |
| 169 | male | 0.067 | *O. bicornis* DWV | 5.30 |
| 170 | male | 0.064 | *O. bicornis* DWV | 4.79 |
| 171 | male | 0.055 | *O. bicornis* DWV | 4.98 |
| 172 | male | 0.053 | *O. bicornis* DWV | 4.65 |
| 173 | male | 0.055 | *O. bicornis* DWV | 5.36 |
| 174 | male | 0.056 | DWV Inoculum | 6.35 |
| 175 | male | 0.052 | DWV Inoculum | 6.35 |
| 176 | male | 0.039 | DWV Inoculum | 6.64 |
| 177 | male | 0.057 | DWV Inoculum | 6.53 |
| 178 | male | 0.049 | DWV Inoculum | 6.67 |
| 179 | male | 0.053 | DWV Inoculum | 6.58 |
| 180 | male | 0.052 | DWV Inoculum | 6.59 |
| 181 | male | 0.033 | DWV Inoculum | 6.42 |
| 182 | male | 0.033 | DWV Inoculum | 6.43 |
| 183 | male | 0.043 | DWV Inoculum | 6.46 |
| 184 | male | 0.045 | DWV Inoculum | 6.38 |
| 185 | male | 0.055 | DWV Inoculum | 6.39 |
