# Supplementary material for: Deformed wing virus prevalence in solitary bees put to the test: an experimental transmission study
Source: Frontiers journal article supplement (doi:10.3389/fevo.2023.1122304), 2023-06-30
Supplement: Table_2.DOCX [file Table_2.DOCX]

Supplementary Material

Deformed wing virus prevalence in solitary bees put to the test: an experimental transmission study

Alexandria Schauer*, Nadia Bianco, Orlando Yañez, Andrew Brown, Matthias Albrecht, Peter Neumann

*** Correspondence:** Corresponding Author: alexandria.schauer@unibe.ch

# Supplementary Figures and Tables

**Supplementary Table 2.** Experimental DWV-A viral titers for individual *Apis mellifera* pupae. Titers are expressed in log-transformed genome copies per microgram of RNA.

| Sample ID | Source Colony | Weight [g] | Treatment Group | DWV-A Titer [log(DWV-A genome copies/µg RNA)] |
| --- | --- | --- | --- | --- |
| 51 | 12P/P12 | 0.102 | *A. mellifera* PBS Control | 5.92 |
| 52 | 4C | 0.108 | *A. mellifera* PBS Control | 4.30 |
| 53 | 12P/P12 | 0.118 | *A. mellifera* PBS Control | 3.12 |
| 54 | 12P/P12 | 0.085 | *A. mellifera* PBS Control | 2.63 |
| 55 | 4C | 0.084 | *A. mellifera* PBS Control | 3.52 |
| 56 | 12P/P12 | 0.096 | *A. mellifera* PBS Control | 4.77 |
| 57 | 12P/P12 | 0.106 | *A. mellifera* PBS Control | 2.61 |
| 58 | 4C | 0.112 | *A. mellifera* PBS Control | 3.52 |
| 59 | 12P/P12 | 0.092 | *A. mellifera* PBS Control | 3.24 |
| 60 | 12P/P12 | 0.107 | *A. mellifera* PBS Control | 2.83 |
| 61 | 4C | 0.102 | *A. mellifera* PBS Control | 3.52 |
| 62 | 12P/P12 | 0.115 | *A. mellifera* PBS Control | 3.57 |
| 63 | 12P/P12 | 0.080 | *A. mellifera* PBS Control | 2.63 |
| 64 | 4C | 0.100 | *A. mellifera* PBS Control | 3.52 |
| 7 | 12P/P12 | 0.145 | *A. mellifera* DWV | 8.21 |
| 8 | 12P/P12 | 0.095 | *A. mellifera* DWV | 9.07 |
| 9 | 4C | 0.113 | *A. mellifera* DWV | 8.83 |
| 10 | 12P/P12 | 0.100 | *A. mellifera* DWV | 9.12 |
| 11 | 12P/P12 | 0.092 | *A. mellifera* DWV | 9.35 |
| 12 | 4C | 0.112 | *A. mellifera* DWV | 9.24 |
| 13 | 12P/P12 | 0.120 | *A. mellifera* DWV | 9.39 |
| 14 | 12P/P12 | 0.060 | *A. mellifera* DWV | 8.84 |
| 15 | 4C | 0.095 | *A. mellifera* DWV | 9.19 |
| 16 | 12P/P12 | 0.130 | *A. mellifera* DWV | 9.20 |
| 17 | 12P/P12 | 0.073 | *A. mellifera* DWV | 8.17 |
| 18 | 4C | 0.118 | *A. mellifera* DWV | 9.45 |
| 19 | 12P/P12 | 0.126 | *A. mellifera* DWV | 9.06 |
| 20 | 4C | 0.071 | *A. mellifera* DWV | 8.52 |
| 21 | 4C | 0.114 | *A. mellifera* DWV | 7.67 |
| 28 | 12P/P12 | 0.109 | *A. mellifera* DWV from *Osmia* | 9.30 |
| 30 | 4C | 0.092 | *A. mellifera* DWV from *Osmia* | 8.29 |
| 31 | 12P/P12 | 0.138 | *A. mellifera* DWV from *Osmia* | 9.72 |
| 33 | 4C | 0.110 | *A. mellifera* DWV from *Osmia* | 7.70 |
| 34 | 12P/P12 | 0.124 | *A. mellifera* DWV from *Osmia* | 9.43 |
| 35 | 12P/P12 | 0.082 | *A. mellifera* DWV from *Osmia* | 8.18 |
| 36 | 4C | 0.117 | *A. mellifera* DWV from *Osmia* | 8.48 |
| 37 | 12P/P12 | 0.112 | *A. mellifera* DWV from *Osmia* | 9.25 |
| 38 | 12P/P12 | 0.106 | *A. mellifera* DWV from *Osmia* | 8.92 |
| 39 | 4C | 0.108 | *A. mellifera* DWV from *Osmia* | 8.75 |
| 40 | 12P/P12 | 0.140 | *A. mellifera* DWV from *Osmia* | 8.73 |
| 41 | 12P/P12 | 0.079 | *A. mellifera* DWV from *Osmia* | 8.52 |
| 42 | 4C | 0.114 | *A. mellifera* DWV from *Osmia* | 8.91 |
| 43 | 12P/P12 | 0.130 | *A. mellifera* DWV from *Osmia* | 8.61 |
| 44 | 12P/P12 | 0.082 | *A. mellifera* DWV from *Osmia* | 9.28 |
| 65 | 12P/P12 | 0.147 | *A. mellifera* No Treatment | 4.28 |
| 66 | 12P/P12 | 0.105 | *A. mellifera* No Treatment | 3.93 |
| 67 | 4C | 0.108 | *A. mellifera* No Treatment | 3.96 |
| 68 | 12P/P12 | 0.137 | *A. mellifera* No Treatment | 3.81 |
| 69 | 12P/P12 | 0.130 | *A. mellifera* No Treatment | 3.89 |
| 71 | 12P/P12 | 0.117 | *A. mellifera* No Treatment | 4.02 |
| 74 | 12P/P12 | 0.076 | *A. mellifera* No Treatment | 3.99 |
| 77 | 12P/P12 | 0.110 | *A. mellifera* No Treatment | 4.28 |
| 80 | 12P/P12 | 0.131 | *A. mellifera* No Treatment | 4.29 |
| 83 | 12P/P12 | 0.069 | *A. mellifera* No Treatment | 3.26 |
| 70 | 12P/P12 | 0.142 | *A. mellifera* No Treatment | 4.87 |
| 72 | 4C | 0.112 | *A. mellifera* No Treatment | 4.18 |
| 73 | 12P/P12 | 0.088 | *A. mellifera* No Treatment | 4.32 |
| 75 | 4C | 0.095 | *A. mellifera* No Treatment | 4.28 |
| 76 | 12P/P12 | 0.085 | *A. mellifera* No Treatment | 4.23 |
| 78 | 4C | 0.099 | *A. mellifera* No Treatment | 4.08 |
| 79 | 12P/P12 | 0.130 | *A. mellifera* No Treatment | 3.26 |
| 81 | 4C | 0.099 | *A. mellifera* No Treatment | 4.05 |
| 82 | 12P/P12 | 0.067 | *A. mellifera* No Treatment | 3.92 |
| 45 | 12P/P12 | 0.142 | *A. mellifera* PBS Control Day 0 | 3.09 |
| 46 | 12P/P12 | 0.142 | *A. mellifera* PBS Control Day 0 | 2.77 |
| 47 | 4C | 0.160 | *A. mellifera* PBS Control Day 0 | 3.01 |
| 48 | 12P/P12 | 0.127 | *A. mellifera* PBS Control Day 0 | 3.49 |
| 49 | 12P/P12 | 0.123 | *A. mellifera* PBS Control Day 0 | 3.35 |
| 50 | 4C | 0.135 | *A. mellifera* PBS Control Day 0 | 3.64 |
| 1 | 12P/P12 | 0.139 | *A. mellifera* DWV Day 0 | 4.39 |
| 2 | 12P/P12 | 0.133 | *A. mellifera* DWV Day 0 | 4.63 |
| 3 | 4C | 0.135 | *A. mellifera* DWV Day 0 | 4.99 |
| 4 | 12P/P12 | 0.151 | *A. mellifera* DWV Day 0 | 4.47 |
| 5 | 12P/P12 | 0.141 | *A. mellifera* DWV Day 0 | 4.81 |
| 6 | 4C | 0.152 | *A. mellifera* DWV Day 0 | 4.24 |
| 22 | 12P/P12 | 0.161 | *A. mellifera* DWV from *Osmia* Day 0 | 3.96 |
| 23 | 12P/P12 | 0.142 | *A. mellifera* DWV from *Osmia* Day 0 | 4.37 |
| 24 | 4C | 0.163 | *A. mellifera* DWV from *Osmia* Day 0 | 4.33 |
| 25 | 12P/P12 | 0.148 | *A. mellifera* DWV from *Osmia* Day 0 | 4.11 |
| 26 | 12P/P12 | 0.135 | *A. mellifera* DWV from *Osmia* Day 0 | 3.90 |
| 27 | 4C | 0.163 | *A. mellifera* DWV from *Osmia* Day 0 | 4.09 |
